# Supplementary material for: Developing a theory of change to guide the design and implementation of a Caregiver- Centric Support Service
Source: Research Square preprint supplement (doi:10.21203/rs.3.rs-3226098/v1), 2023-09-13
Supplement: Supplementary file 1 [file 483e5abf824af303da670bef.pdf]

Table 2. Adaptations made to Project Carer Matters interventions

| Objective                                                                                                              | Initial intervention                                                                                                                                      | Refined intervention                                                                                                                                                                                                                                                                                                                                                                                                                                                                      |
|------------------------------------------------------------------------------------------------------------------------|-----------------------------------------------------------------------------------------------------------------------------------------------------------|-------------------------------------------------------------------------------------------------------------------------------------------------------------------------------------------------------------------------------------------------------------------------------------------------------------------------------------------------------------------------------------------------------------------------------------------------------------------------------------------|
| Increase exposure and publicity of Project Carer Matters to help caregivers better identify their role as a caregiver. | <ul style="list-style-type: none"> <li>• Inpatient ward nurses approached caregivers during admission.</li> </ul>                                         | <ul style="list-style-type: none"> <li>• Brochures on Project Carer Matters placed in post-discharge package to caregivers and patients.</li> <li>• Large posters on Project Carer Matters placed strategically in ward lifts and on digital information boards.</li> <li>• Project Carer Matters' microsite set up (<a href="#">Project Carer Matters Webpage</a>) [36].</li> <li>• Publicity video displayed on social media to increase awareness on Project Carer Matters.</li> </ul> |
| Recruitment of family caregivers                                                                                       | <ul style="list-style-type: none"> <li>• Inpatient ward nurses identified, engaged, and recruited the caregivers when they visit the hospital.</li> </ul> | <ul style="list-style-type: none"> <li>• Inpatient ward nurses sought caregivers' agreement to be contacted by project nurses and simultaneously directed caregivers to</li> </ul>                                                                                                                                                                                                                                                                                                        |

|                                          |                                                                                                                         |                                                                                                                                                                                                                                                                                                                                                                                                                        |
|------------------------------------------|-------------------------------------------------------------------------------------------------------------------------|------------------------------------------------------------------------------------------------------------------------------------------------------------------------------------------------------------------------------------------------------------------------------------------------------------------------------------------------------------------------------------------------------------------------|
|                                          |                                                                                                                         | <p>complete the caregiver assessment via a QR code.</p> <ul style="list-style-type: none"> <li>• Other clinical staff trained to refer caregivers to the project nurses.</li> <li>• Caregivers scanned Project Carer Matters QR code and completed needs assessment independently.</li> <li>• Caregivers who are unable to complete the needs assessment form independently are assisted by project nurses.</li> </ul> |
| Delivery of caregivers' training courses | <ul style="list-style-type: none"> <li>• In-person and on-site training courses (i.e., hands-on simulation).</li> </ul> | <ul style="list-style-type: none"> <li>• Courses conducted online during COVID-19 pandemic.</li> <li>• Caregivers engaged in caregiving simulations via ZOOM platform during the courses.</li> <li>• Project nurses re-enacted scenarios to help</li> </ul>                                                                                                                                                            |

|                                                                                           |                                                                                                                                                                    |                                                                                                                                                                                                                                                                                                                                                                                                                                                              |
|-------------------------------------------------------------------------------------------|--------------------------------------------------------------------------------------------------------------------------------------------------------------------|--------------------------------------------------------------------------------------------------------------------------------------------------------------------------------------------------------------------------------------------------------------------------------------------------------------------------------------------------------------------------------------------------------------------------------------------------------------|
|                                                                                           |                                                                                                                                                                    | caregivers role play virtually.                                                                                                                                                                                                                                                                                                                                                                                                                              |
| Overlapping services with community healthcare providers who offer supports to caregivers | <ul style="list-style-type: none"> <li>• Project nurses confirmed with caregivers if they received follow-up from other hospital or community services.</li> </ul> | <ul style="list-style-type: none"> <li>• Project nurses met up with community healthcare providers to clarify on the different roles and responsibilities of Project Carer Matters.</li> <li>• Project nurses clarified with community healthcare providers about the time period Project Carer Matters would support caregivers.</li> <li>• Collaborated with community healthcare providers to follow up on caregivers' needs in the community.</li> </ul> |
