# Supplementary material for: Developing a theory of change to guide the design and implementation of a Caregiver- Centric Support Service
Source: Research Square preprint supplement (doi:10.21203/rs.3.rs-3226098/v1), 2023-09-13
Supplement: Supplementary file 2 [file 76db2304f15faa1e87e47d93.pdf]

Table 1: Summary of Project Carer Matters training courses for caregivers

| Training Courses                                                                         | Course Description                                                                                                                                                                                                                                                                                                                                                               |
|------------------------------------------------------------------------------------------|----------------------------------------------------------------------------------------------------------------------------------------------------------------------------------------------------------------------------------------------------------------------------------------------------------------------------------------------------------------------------------|
| CARERS (Coaching, Advocacy, Respite, Education, Relationship. Simulation) Programme [37] | This therapeutic evidence-based group intervention features a unique hands-on simulation exercise in the presence of a simulated patient to practice the application of problem-solving techniques. The course is co-led by two facilitators and held weekly over eight weeks in small groups of four to six participants and is offered to caregivers of persons with dementia. |
| TEACH Programme                                                                          | This interactive group course aims to build caregiving skills and provide emotional support for family caregivers. Sessions are tailored to central themes of caregiving (changing relationship, community resource navigation, future planning, self-care).                                                                                                                     |
| Understanding Dementia                                                                   | This course helps caregivers understand dementia, the nature of Behavioural and Psychological Symptoms of Dementia (BPSD) and general approaches to challenging behaviours.                                                                                                                                                                                                      |
| Problem-solving techniques                                                               | This course introduces a five-step problem solving technique adapted from the CARERS programme [33]. This is a group session tailored to help caregivers address practical problems faced [33].                                                                                                                                                                                  |
| Self-care                                                                                | This course helps caregivers recognise the importance of self-care and learn practical self-care tips.                                                                                                                                                                                                                                                                           |

|                           |                                                                                                                                               |
|---------------------------|-----------------------------------------------------------------------------------------------------------------------------------------------|
| Caregiving Essentials     | This group course helps caregivers understand more about caregiving and provide practical caregiving tips.                                    |
| Public<br>Forums/Seminars | The seminars are designed to provide generic sought-after information for caregivers, such as financial support availability and home safety. |
